# Supplementary material
Source: PubMed Central journal article supplement (PMC2998169)

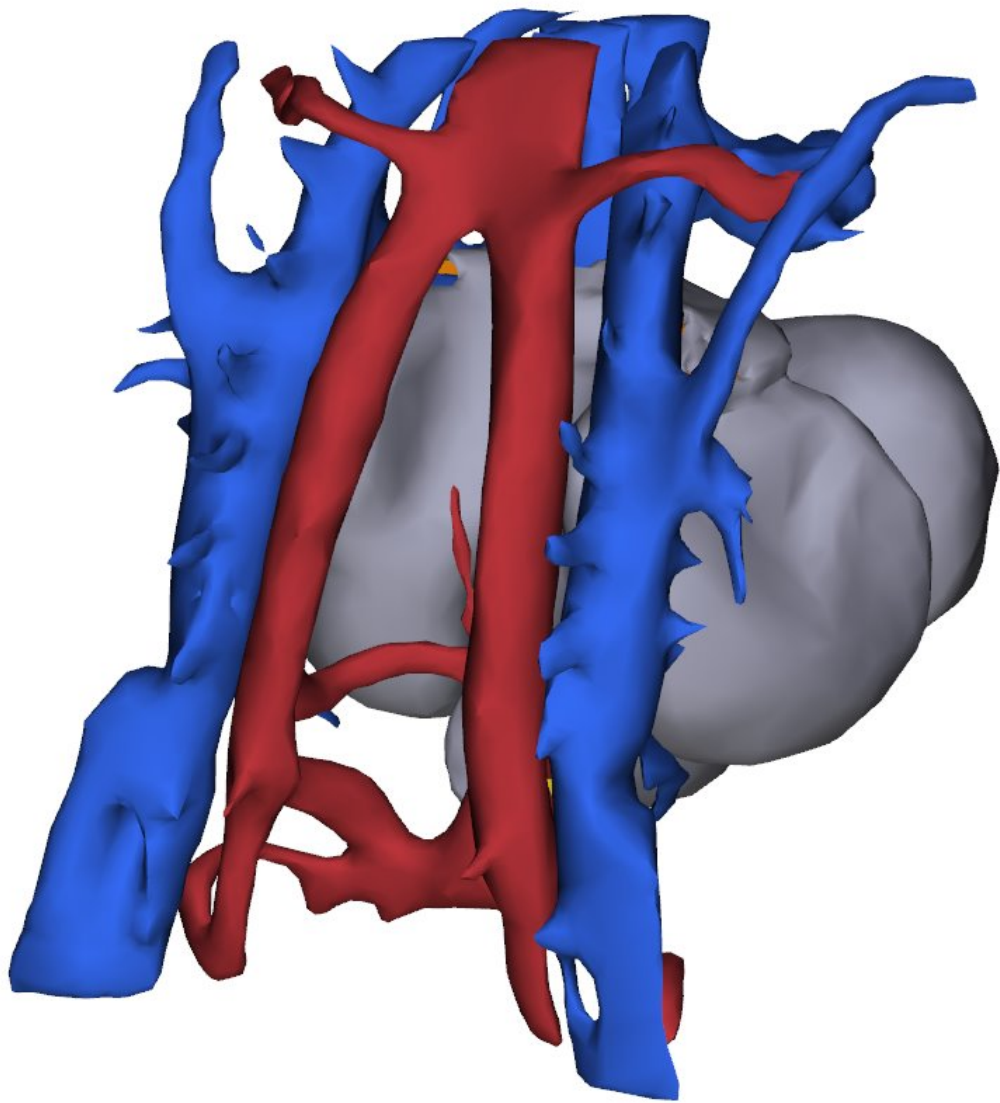

Supplement: supp_138.1.159_DEV051086FigS2.pdf [file supp_138.1.159_DEV051086FigS2.pdf]
